# Supplementary material
Source: publisher figshare collection journal article supplement (https://springernature.figshare.com/ndownloader/files/17445995)
Supplement: Supplementary file [file 17445995]

## **Supplementary Material**

**Figure S1.** Approach used to define kidney disease and health outcomes in the analytic cohort.

CHF, congestive heart failure; DKD, diabetic kidney disease; DM diabetes mellitus; ESRD, end-stage renal disease.

**Table S1.** International Classification of Diseases, Ninth Revision, Clinical Modification

diagnosis codes used to identify diabetes, chronic kidney disease, comorbid conditions, and adverse events

**Figure S2.** Construction of the analytic cohort. DKD, diabetic kidney disease; ESRD, end-stage renal disease; HMO, health maintenance organization.

**Table S2.** Stage of incident chronic kidney disease in patients with diabetes, ages 18-64 years, 2011-2013.

Figure S1. Approach used to define kidney disease and health outcomes in the analytic cohort.  
CHF, congestive heart failure; DKD diabetic kidney disease; DM, diabetes mellitus; ESRD, end-stage renal disease.

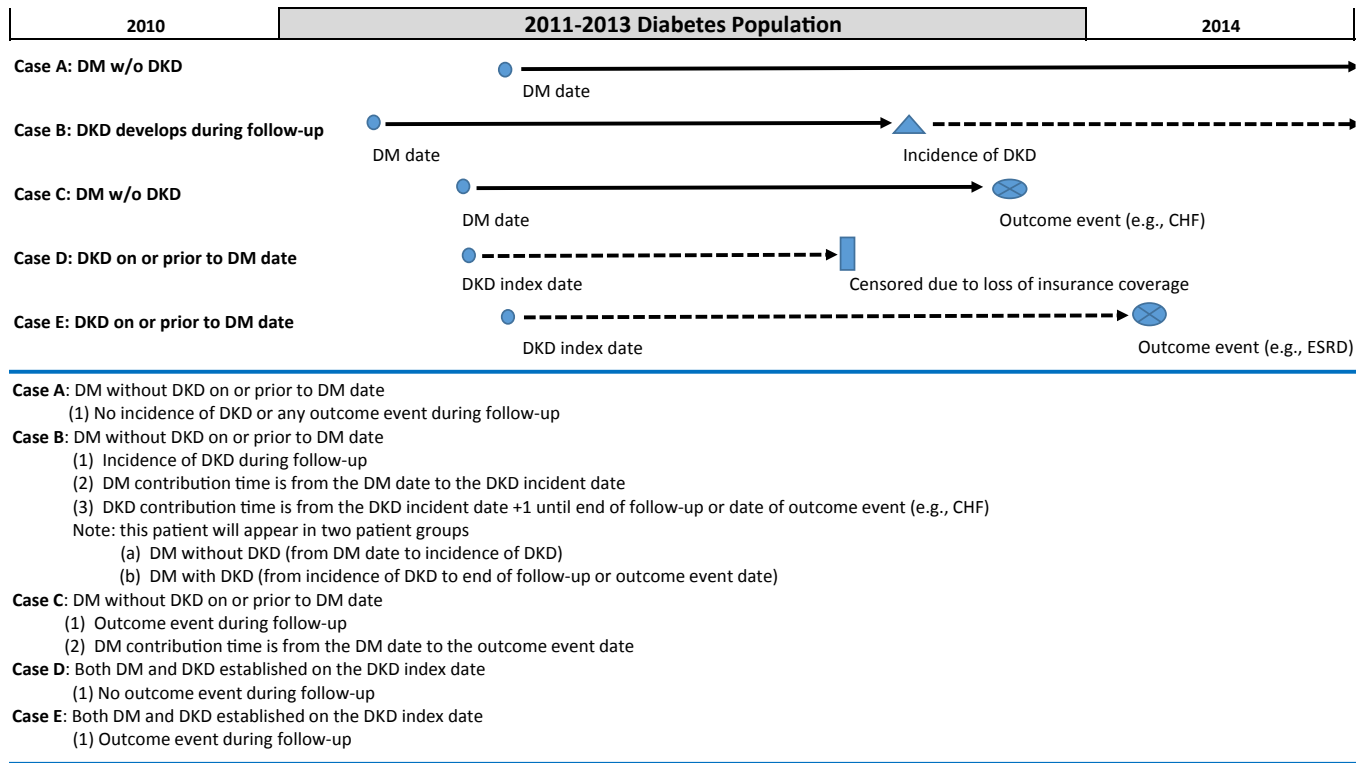

**Table S1.** International Classification of Diseases, Ninth Revision, Clinical

Modification diagnosis codes used to identify diabetes, chronic kidney disease, comorbid conditions, and adverse events

| Conditions and Events                   | ICD-9-CM Diagnosis Codes                                                                                                           |
|-----------------------------------------|------------------------------------------------------------------------------------------------------------------------------------|
| <b>Diseases</b>                         |                                                                                                                                    |
| Diabetes                                | 249.4; 250; 357.2; 362.0x; 366.41                                                                                                  |
| CKD                                     | 250.4; 581; 583.81; 585-587; 588.0; 588.9; 794.4                                                                                   |
| <b>Comorbid conditions</b>              | ICD-9-CM                                                                                                                           |
| CHF                                     | 398.91, 402.11, 402.91, 404.11, 404.13, 404.91, 404.93, 428.x                                                                      |
| Cardiac arrhythmias                     | 426.10, 426.11, 426.13, 426.2-426.53, 426.6-426.8, 427.0, 427.2, 427.31, 427.60, 427.9, 785.0, V45.0, V53.3                        |
| Valvular disease                        | 093.2, 394.0-397.1, 424.0-424.91, 746.3-746.6, V42.2, V43.3                                                                        |
| Pulmonary circulation disorders         | 416.x, 417.9                                                                                                                       |
| Peripheral vascular disorders           | 440.x, 441.2, 441.4, 441.7, 441.9, 443.1- 443.9, 447.1, 557.1, 557.9, V43.4                                                        |
| Hypertension, uncomplicated             | 401.1, 401.9                                                                                                                       |
| Hypertension, complicated               | 402.10, 402.90, 404.10, 404.90, 405.1, 405.9                                                                                       |
| Paralysis                               | 342.0, 342.1, 342.9-344.x                                                                                                          |
| Other neurological disorders            | 331.9, 332.0, 333.4, 333.5, 334.x, 335.x, 340.x, 341.1-341.9, 345.0, 345.1, 345.4, 345.5, 345.8, 345.9, 348.1, 348.3, 780.3, 784.3 |
| Chronic pulmonary disease               | 490-492.8, 493.00-493.91, 494.x-505.x, 506.4                                                                                       |
| Diabetes, uncomplicated                 | 250.0-250.3                                                                                                                        |
| Diabetes, complicated                   | 250.4-250.7, 250.9                                                                                                                 |
| Hypothyroidism                          | 243-244.2, 244.8, 244.9                                                                                                            |
| Renal failure                           | 403.11, 403.91, 404.12, 404.92, 585.x, 586.x, V42.0, V45.1, V56.0, V56.8                                                           |
| Liver disease                           | 070.32, 070.33, 070.54, 456.0, 456.1, 456.2, 571.0, 571.2-571.9, 572.3, 572.8, V42.7                                               |
| Peptic ulcer disease excluding bleeding | 531.70, 531.90, 532.70, 532.90, 533.70, 533.90, 534.70, 534.90, V12.71                                                             |
| AIDS/HIV                                | 042.x-044.x                                                                                                                        |
| Lymphoma                                | 200.x-202.3x, 202.5-203.0, 203.8, 238.6, 273.3, V10.71, V10.72, V10.79                                                             |
| Metastatic cancer                       | 196.x-199.x                                                                                                                        |
| Solid tumor without metastasis          | 140.x-172.x, 174.x, 175.x, 179.x-195.x, V10.x                                                                                      |
| RA/collagen vascular disease            | 701.0, 710.x, 714.x, 720.x, 725.x                                                                                                  |
| Coagulopathy                            | 286.x, 287.1, 287.3-287.5                                                                                                          |
| Obesity                                 | 278.0                                                                                                                              |
| Weight loss                             | 260.x-263.x                                                                                                                        |
| Fluid and electrolyte disorders         | 276.x                                                                                                                              |
| Blood loss anemia                       | 280.0                                                                                                                              |
| Deficiency anemia                       | 280.1-281.9, 285.9                                                                                                                 |
| Alcohol abuse                           | 291.1, 291.2, 291.5-291.9, 303.9, 305.0, V113                                                                                      |
| Drug abuse                              | 292.0, 292.82-292.89, 292.9, 304.0, 305.2, 305.9                                                                                   |
| Psychoses                               | 295.x-298.x, 299.1                                                                                                                 |
| Depression                              | 300.4, 301.12, 309.0, 309.1, 311                                                                                                   |
| Stroke                                  | 433.x1, 434.x1, 430, 431, 432, 433.x0, 434.x0, 436, 437, 438                                                                       |
| <b>Outcomes</b>                         |                                                                                                                                    |

|            |                                                                                                                                                                                                                                                                                                                                                                                                                                                                                   |
|------------|-----------------------------------------------------------------------------------------------------------------------------------------------------------------------------------------------------------------------------------------------------------------------------------------------------------------------------------------------------------------------------------------------------------------------------------------------------------------------------------|
| ESRD       | ICD-9-CM diagnosis codes: 585.6, 585.60, 996.81, V420, V4200;<br>DRG: 008, 302, 512, 652; revenue center codes: 0820-0859                                                                                                                                                                                                                                                                                                                                                         |
| MI*        | 410.xx (not 410.x2)                                                                                                                                                                                                                                                                                                                                                                                                                                                               |
| CHF*       | 276.6x, , 402.01, 402.11, 402.91, 404.01, 404.03, 404.11, 404.13,<br>404.91, 404.93, 428.x                                                                                                                                                                                                                                                                                                                                                                                        |
| Stroke*    | Ischemic stroke: 433.x1, 434.x1; hemorrhagic stroke: 430, 431, 432;<br>cerebrovascular disease: 433.x0, 434.x0, 436                                                                                                                                                                                                                                                                                                                                                               |
| Infection* | 036.x, 790.7, 038.x, 041.x, 730.0, 730.1, 730.3-730.9, 391.x, 392.x,<br>421.x, 422.0, 422.90, 422.92, 480-486, 510.x, 513.x, 590.x, 595.x,<br>597.x, 599.0, 601.x, 604.0, 608.0, 608.4, 607.1, 607.2, 616.1-616.4,<br>254.1, 320-324, 382.0-382.4, 383.0-383.2, 478.22, 478.23, 478.24,<br>478.29, 522.5, 522.7, 527.3, 528.3, 540-542, 566.x, 567.0-567.3,<br>567.81, 567.9, 569.5, 572.0, 572.1, 575.0, 575.1, 611.0, 614.0-614.5,<br>615.0, 615.9, 711.0, 997.62, 998.5, 999.3 |

---

\*Inpatient only, first five positions.

CHF, congestive heart failure; CKD, chronic kidney disease; DRG, diagnosis-related group;

ESRD, end-stage renal disease; ICD-9-CM, International Classification of Diseases, Ninth

Revision, Clinical Modification; MI, myocardial infarction; RA, rheumatoid arthritis.

Figure S2. Construction of the analytic cohort. DKD, diabetic kidney disease; ESRD, end-stage renal disease; HMO, health maintenance organization.

2011-2013 patients with diabetes meeting the following criteria ( $n = 2,966,282$ ):

- Diabetes date January 1, 2011-December 31, 2013.
- Age  $\geq 18$  years on the diabetes date.
- Continuous insurance coverage, not in an HMO, non-ESRD in the year before the diabetes date.
- Alive with insurance coverage, non-ESRD on the diabetes date +1.

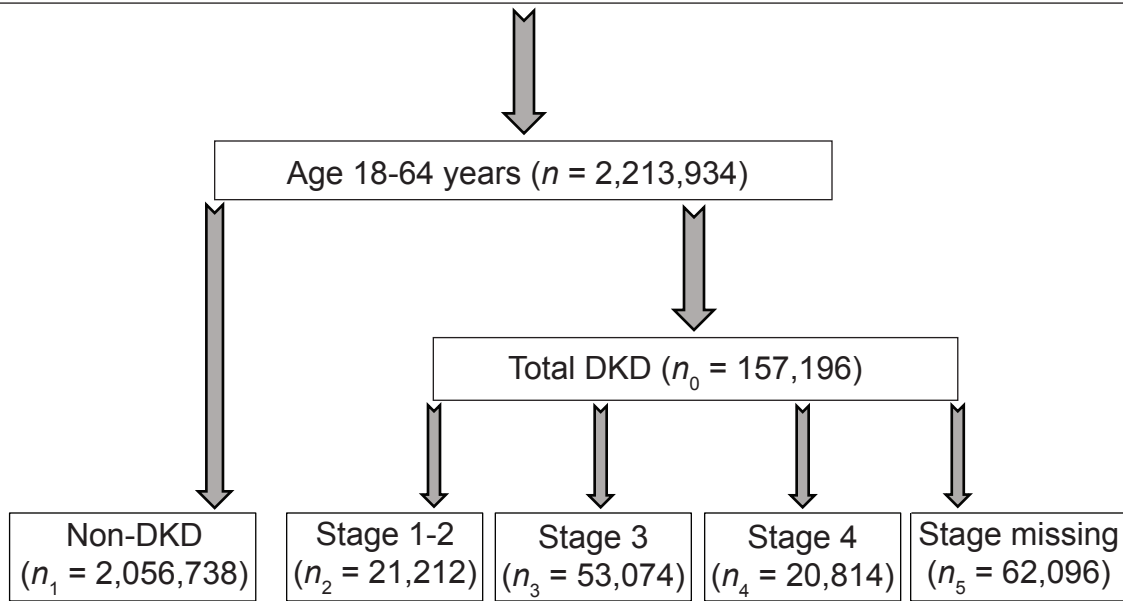

**Table S2.** Stage of incident chronic kidney disease in patients with diabetes, ages 18-64 years, 2011-2013

| Stage                   | All    | Men    | Women  |
|-------------------------|--------|--------|--------|
| All stages, <i>n</i>    | 88,673 | 51,999 | 36,674 |
| Stages 1-5, <i>n</i>    | 53,300 | 31,264 | 22,036 |
| Stage 1, <i>n</i>       | 4178   | 2395   | 2395   |
| % of known stage        | 7.8    | 7.7    | 8.1    |
| % of total              | 4.7    | 4.6    | 4.9    |
| Stage 2, <i>n</i>       | 8368   | 5126   | 3242   |
| % of known stage        | 15.7   | 16.4   | 14.7   |
| % of total              | 9.4    | 9.9    | 8.8    |
| Stage 3, <i>n</i>       | 29,940 | 17,560 | 12,380 |
| % of known stage        | 56.2   | 56.2   | 56.2   |
| % of total              | 33.8   | 33.8   | 33.8   |
| Stage 4, <i>n</i>       | 6056   | 3393   | 2663   |
| % of known stage        | 11.4   | 10.9   | 12.1   |
| % of total              | 6.8    | 6.5    | 7.3    |
| Stage 5, <i>n</i>       | 4758   | 2790   | 1968   |
| % of known stage        | 8.9    | 8.9    | 8.9    |
| % of total              | 5.4    | 5.4    | 5.4    |
| Stage unknown, <i>n</i> | 35,373 | 20,735 | 14,638 |
| % of total              | 39.9   | 39.9   | 39.9   |
